# Supplementary material for: Synthesis, structural studies and reactivity of vanadium complexes with tridentate (OSO) ligand
Source: Royal Society of Chemistry journal article supplement (doi:10.1039/b616961a), 2007-01-01
Supplement: b616961a.pdf [file b616961a.pdf]

Supplemental Information for:

“Synthesis, structural studies and reactivity of vanadium complexes with tridentate (OSO) ligand”

by Zofia Janas, Dorota Wiśniewska, Lucjan B. Jerzykiewicz, Piotr Sobota, Krzysztof Drabent and Krzysztof Szczegot

Faculty of Chemistry, University of Wrocław, 14 F. Joliot-Curie Street, 50-383 Wrocław, Poland

\* Corresponding author: [zj@wchuwr.chem.uni.wroc.pl](mailto:zj@wchuwr.chem.uni.wroc.pl)

1. Details of the crystal structure determination for **1**·4CH<sub>3</sub>CN.
2. Polymerisation data for **1** and **2**.



Table S-1. Crystal data and structure refinement for  $C_{60}H_{86}Cl_2N_2O_4S_2V_2$  (**1**)·4CH<sub>3</sub>CN.

|                                                                                                                |                                                   |
|----------------------------------------------------------------------------------------------------------------|---------------------------------------------------|
| Compound                                                                                                       | $C_{60}H_{86}Cl_2N_2O_4S_2V_2 \cdot 4CH_3CN$      |
| Chemical formula                                                                                               | $C_{68}H_{98}Cl_2N_6O_4S_2V_2$                    |
| <b>CCDC</b>                                                                                                    | <b>604895</b>                                     |
| Formula weight                                                                                                 | 1300.44                                           |
| $\lambda$ (Å)                                                                                                  | 0.71073                                           |
| T(K)                                                                                                           | 100(2)                                            |
| Space group                                                                                                    | P -1                                              |
| Crystal system                                                                                                 | Triclinic                                         |
| Unit cell dimensions                                                                                           |                                                   |
| a (Å)                                                                                                          | 8.480(3)                                          |
| b (Å)                                                                                                          | 14.312(5)                                         |
| c (Å)                                                                                                          | 15.312(7)                                         |
| alpha (°)                                                                                                      | 93.17(3)                                          |
| Beta (°)                                                                                                       | 93.88(3)                                          |
| gamma (°)                                                                                                      | 102.56(3)                                         |
| V (Å <sup>3</sup> )                                                                                            | 1805.0(12)                                        |
| Z                                                                                                              | 1                                                 |
| D <sub>c</sub> (Mg/m <sup>3</sup> )                                                                            | 1.196                                             |
| F(000)                                                                                                         | 692                                               |
| Habit                                                                                                          | block                                             |
| Crystal size (mm)                                                                                              | 0.63 x 0.40 x 0.35                                |
| $\mu$ (mm <sup>-1</sup> )                                                                                      | 0.438                                             |
| Absorption correction                                                                                          | Empirical (SHELXA)                                |
| Max. and min.                                                                                                  | transmission 0.833 and 0.483                      |
| Type of diffractometer                                                                                         | Kuma KM4 automatic diffractometer                 |
| Diffraction geometry                                                                                           | $\omega$ -2 $\theta$                              |
| Theta range (°)                                                                                                | 2.05 to 25.08                                     |
| Number of reflections measured                                                                                 | 6873                                              |
| Number of unique reflections                                                                                   | 6402                                              |
| R <sub>(int)</sub>                                                                                             | 0.0409                                            |
| Number of observed reflections                                                                                 | 4695 [I > 2 $\sigma$ (I)]                         |
| Refinement method                                                                                              | least-squares on F <sup>2</sup>                   |
| Number of parameters                                                                                           | 392                                               |
| Final R indices [I > 2 $\sigma$ (I)]                                                                           | R <sub>1</sub> = 0.0568, wR <sub>2</sub> = 0.1552 |
| Final R indices (all data)                                                                                     | R <sub>1</sub> = 0.0846, wR <sub>2</sub> = 0.1723 |
| Goodness-of-fit (S)                                                                                            | 1.043                                             |
| Largest diff. peak and hole e.Å <sup>-3</sup>                                                                  | 0.836 and -1.058                                  |
| $R_1 = \sum   F_o  -  F_c   / \sum  F_o $ ; $wR_2 = \{ \sum [w(F_o^2 - F_c^2)^2] / \sum [w(F_o^2)^2] \}^{1/2}$ |                                                   |

Table S-2. Bond lengths [Å] and angles [deg] for  $C_{60}H_8Cl_2N_2O_4S_2V_2$  (**1**)·4CH<sub>3</sub>CN.

---

|                  |            |
|------------------|------------|
| V(1)-O(2)        | 1.873(2)   |
| V(1)-O(1)        | 1.999(2)   |
| V(1)-N(1)        | 2.163(3)   |
| V(1)-Cl(1)       | 2.3148(12) |
| V(1)-S(1)        | 2.4741(13) |
| S(1)-C(11)       | 1.779(3)   |
| S(1)-C(21)       | 1.788(3)   |
| O(1)-C(12)       | 1.356(4)   |
| O(2)-C(22)       | 1.345(4)   |
| N(1)-C(1)        | 1.144(4)   |
| N(2)-C(3)        | 1.132(5)   |
| C(1)-C(2)        | 1.459(5)   |
| C(3)-C(4)        | 1.457(5)   |
| C(11)-C(16)      | 1.381(4)   |
| C(11)-C(12)      | 1.408(4)   |
| C(12)-C(13)      | 1.399(4)   |
| C(13)-C(14)      | 1.380(5)   |
| C(14)-C(15)      | 1.394(4)   |
| C(15)-C(16)      | 1.402(4)   |
| C(15)-C(150)     | 1.529(4)   |
| C(21)-C(26)      | 1.385(4)   |
| C(21)-C(22)      | 1.396(4)   |
| C(22)-C(23)      | 1.401(4)   |
| C(23)-C(24)      | 1.385(5)   |
| C(24)-C(25)      | 1.406(5)   |
| C(25)-C(26)      | 1.395(4)   |
| C(25)-C(250)     | 1.526(4)   |
| C(150)-C(153)    | 1.534(4)   |
| C(150)-C(151)    | 1.546(4)   |
| C(150)-C(154)    | 1.551(4)   |
| C(151)-C(152)    | 1.548(4)   |
| C(152)-C(157)    | 1.522(5)   |
| C(152)-C(156)    | 1.538(4)   |
| C(152)-C(155)    | 1.543(4)   |
| C(250)-C(254)    | 1.540(4)   |
| C(250)-C(253)    | 1.547(5)   |
| C(250)-C(251)    | 1.548(5)   |
| C(251)-C(252)    | 1.540(5)   |
| C(252)-C(255)    | 1.519(6)   |
| C(252)-C(256)    | 1.524(6)   |
| C(252)-C(257)    | 1.528(6)   |
| N(3)-C(5)        | 1.174(11)  |
| C(5)-C(6)        | 1.466(12)  |
| O(2)-V(1)-O(1)   | 96.21(9)   |
| O(2)-V(1)-N(1)   | 173.34(10) |
| O(1)-V(1)-N(1)   | 80.13(9)   |
| O(2)-V(1)-Cl(1)  | 98.05(8)   |
| O(1)-V(1)-Cl(1)  | 165.39(7)  |
| N(1)-V(1)-Cl(1)  | 85.37(8)   |
| O(2)-V(1)-S(1)   | 84.69(8)   |
| O(1)-V(1)-S(1)   | 81.63(7)   |
| N(1)-V(1)-S(1)   | 89.25(8)   |
| Cl(1)-V(1)-S(1)  | 96.51(4)   |
| C(11)-S(1)-C(21) | 101.86(13) |
| C(11)-S(1)-V(1)  | 94.88(10)  |
| C(21)-S(1)-V(1)  | 92.49(11)  |

|                      |             |
|----------------------|-------------|
| C(12)-O(1)-V(1)      | 121.18 (17) |
| C(22)-O(2)-V(1)      | 122.27 (19) |
| C(1)-N(1)-V(1)       | 165.8 (3)   |
| N(1)-C(1)-C(2)       | 178.6 (4)   |
| N(2)-C(3)-C(4)       | 179.4 (4)   |
| C(16)-C(11)-C(12)    | 121.6 (3)   |
| C(16)-C(11)-S(1)     | 120.1 (2)   |
| C(12)-C(11)-S(1)     | 118.3 (2)   |
| O(1)-C(12)-C(13)     | 123.3 (3)   |
| O(1)-C(12)-C(11)     | 119.5 (2)   |
| C(13)-C(12)-C(11)    | 117.2 (3)   |
| C(14)-C(13)-C(12)    | 120.4 (3)   |
| C(13)-C(14)-C(15)    | 122.8 (3)   |
| C(14)-C(15)-C(16)    | 116.7 (3)   |
| C(14)-C(15)-C(150)   | 123.7 (3)   |
| C(16)-C(15)-C(150)   | 119.6 (3)   |
| C(11)-C(16)-C(15)    | 121.2 (3)   |
| C(26)-C(21)-C(22)    | 122.3 (3)   |
| C(26)-C(21)-S(1)     | 120.4 (2)   |
| C(22)-C(21)-S(1)     | 117.3 (2)   |
| O(2)-C(22)-C(21)     | 121.9 (3)   |
| O(2)-C(22)-C(23)     | 121.2 (3)   |
| C(21)-C(22)-C(23)    | 116.9 (3)   |
| C(24)-C(23)-C(22)    | 120.9 (3)   |
| C(23)-C(24)-C(25)    | 122.1 (3)   |
| C(26)-C(25)-C(24)    | 116.8 (3)   |
| C(26)-C(25)-C(250)   | 119.4 (3)   |
| C(24)-C(25)-C(250)   | 123.7 (3)   |
| C(21)-C(26)-C(25)    | 121.0 (3)   |
| C(15)-C(150)-C(153)  | 111.8 (2)   |
| C(15)-C(150)-C(151)  | 112.5 (2)   |
| C(153)-C(150)-C(151) | 112.2 (2)   |
| C(15)-C(150)-C(154)  | 106.8 (2)   |
| C(153)-C(150)-C(154) | 107.0 (2)   |
| C(151)-C(150)-C(154) | 106.0 (2)   |
| C(150)-C(151)-C(152) | 122.5 (2)   |
| C(157)-C(152)-C(156) | 110.2 (3)   |
| C(157)-C(152)-C(155) | 107.9 (3)   |
| C(156)-C(152)-C(155) | 107.3 (3)   |
| C(157)-C(152)-C(151) | 113.5 (3)   |
| C(156)-C(152)-C(151) | 112.1 (3)   |
| C(155)-C(152)-C(151) | 105.4 (2)   |
| C(25)-C(250)-C(254)  | 111.9 (3)   |
| C(25)-C(250)-C(253)  | 107.7 (3)   |
| C(254)-C(250)-C(253) | 107.0 (3)   |
| C(25)-C(250)-C(251)  | 112.6 (3)   |
| C(254)-C(250)-C(251) | 111.5 (3)   |
| C(253)-C(250)-C(251) | 105.8 (3)   |
| C(252)-C(251)-C(250) | 124.7 (3)   |
| C(255)-C(252)-C(256) | 111.3 (5)   |
| C(255)-C(252)-C(257) | 106.7 (4)   |
| C(256)-C(252)-C(257) | 107.2 (3)   |
| C(255)-C(252)-C(251) | 112.8 (3)   |
| C(256)-C(252)-C(251) | 112.5 (3)   |
| C(257)-C(252)-C(251) | 106.0 (4)   |
| N(3)-C(5)-C(6)       | 177.7 (9)   |

---

Table S-3. Torsion angles [deg] for C<sub>60</sub>H<sub>86</sub>Cl<sub>2</sub>N<sub>2</sub>O<sub>4</sub>S<sub>2</sub>V<sub>2</sub> (**1**)·4CH<sub>3</sub>CN.

---

|                          |             |
|--------------------------|-------------|
| O(2)-V(1)-S(1)-C(11)     | 110.99(12)  |
| O(1)-V(1)-S(1)-C(11)     | 13.90(11)   |
| N(1)-V(1)-S(1)-C(11)     | -66.24(12)  |
| Cl(1)-V(1)-S(1)-C(11)    | -151.49(10) |
| O(2)-V(1)-S(1)-C(21)     | 8.86(11)    |
| O(1)-V(1)-S(1)-C(21)     | -88.23(11)  |
| N(1)-V(1)-S(1)-C(21)     | -168.37(11) |
| Cl(1)-V(1)-S(1)-C(21)    | 106.38(10)  |
| O(2)-V(1)-O(1)-C(12)     | -104.9(2)   |
| N(1)-V(1)-O(1)-C(12)     | 69.5(2)     |
| Cl(1)-V(1)-O(1)-C(12)    | 62.4(3)     |
| S(1)-V(1)-O(1)-C(12)     | -21.24(19)  |
| O(1)-V(1)-O(2)-C(22)     | 70.6(2)     |
| N(1)-V(1)-O(2)-C(22)     | 14.3(9)     |
| Cl(1)-V(1)-O(2)-C(22)    | -106.2(2)   |
| S(1)-V(1)-O(2)-C(22)     | -10.4(2)    |
| O(2)-V(1)-N(1)-C(1)      | 4.6(16)     |
| O(1)-V(1)-N(1)-C(1)      | -52.5(10)   |
| Cl(1)-V(1)-N(1)-C(1)     | 125.7(10)   |
| S(1)-V(1)-N(1)-C(1)      | 29.1(10)    |
| V(1)-N(1)-C(1)-C(2)      | 10(16)      |
| C(21)-S(1)-C(11)-C(16)   | -95.4(3)    |
| V(1)-S(1)-C(11)-C(16)    | 171.0(2)    |
| C(21)-S(1)-C(11)-C(12)   | 84.5(2)     |
| V(1)-S(1)-C(11)-C(12)    | -9.1(2)     |
| V(1)-O(1)-C(12)-C(13)    | -160.0(2)   |
| V(1)-O(1)-C(12)-C(11)    | 21.7(3)     |
| C(16)-C(11)-C(12)-O(1)   | 175.1(3)    |
| S(1)-C(11)-C(12)-O(1)    | -4.8(4)     |
| C(16)-C(11)-C(12)-C(13)  | -3.3(4)     |
| S(1)-C(11)-C(12)-C(13)   | 176.8(2)    |
| O(1)-C(12)-C(13)-C(14)   | -173.8(3)   |
| C(11)-C(12)-C(13)-C(14)  | 4.5(4)      |
| C(12)-C(13)-C(14)-C(15)  | -2.2(5)     |
| C(13)-C(14)-C(15)-C(16)  | -1.5(4)     |
| C(13)-C(14)-C(15)-C(150) | 174.9(3)    |
| C(12)-C(11)-C(16)-C(15)  | -0.3(4)     |
| S(1)-C(11)-C(16)-C(15)   | 179.6(2)    |
| C(14)-C(15)-C(16)-C(11)  | 2.7(4)      |
| C(150)-C(15)-C(16)-C(11) | -173.8(3)   |
| C(11)-S(1)-C(21)-C(26)   | 76.7(2)     |
| V(1)-S(1)-C(21)-C(26)    | 172.2(2)    |
| C(11)-S(1)-C(21)-C(22)   | -103.8(2)   |
| V(1)-S(1)-C(21)-C(22)    | -8.3(2)     |
| V(1)-O(2)-C(22)-C(21)    | 7.7(4)      |
| V(1)-O(2)-C(22)-C(23)    | -170.9(2)   |
| C(26)-C(21)-C(22)-O(2)   | -177.6(3)   |
| S(1)-C(21)-C(22)-O(2)    | 3.0(4)      |
| C(26)-C(21)-C(22)-C(23)  | 1.1(4)      |
| S(1)-C(21)-C(22)-C(23)   | -178.4(2)   |
| O(2)-C(22)-C(23)-C(24)   | 178.1(3)    |
| C(21)-C(22)-C(23)-C(24)  | -0.6(4)     |
| C(22)-C(23)-C(24)-C(25)  | -0.1(5)     |
| C(23)-C(24)-C(25)-C(26)  | 0.4(4)      |
| C(23)-C(24)-C(25)-C(250) | -178.0(3)   |
| C(22)-C(21)-C(26)-C(25)  | -0.8(4)     |
| S(1)-C(21)-C(26)-C(25)   | 178.6(2)    |

|                                    |            |
|------------------------------------|------------|
| C (24) -C (25) -C (26) -C (21)     | 0.1 (4)    |
| C (250) -C (25) -C (26) -C (21)    | 178.6 (3)  |
| C (14) -C (15) -C (150) -C (153)   | 1.1 (4)    |
| C (16) -C (15) -C (150) -C (153)   | 177.4 (3)  |
| C (14) -C (15) -C (150) -C (151)   | 128.5 (3)  |
| C (16) -C (15) -C (150) -C (151)   | -55.2 (3)  |
| C (14) -C (15) -C (150) -C (154)   | -115.6 (3) |
| C (16) -C (15) -C (150) -C (154)   | 60.6 (3)   |
| C (15) -C (150) -C (151) -C (152)  | -72.6 (3)  |
| C (153) -C (150) -C (151) -C (152) | 54.6 (4)   |
| C (154) -C (150) -C (151) -C (152) | 171.1 (3)  |
| C (150) -C (151) -C (152) -C (157) | 48.9 (4)   |
| C (150) -C (151) -C (152) -C (156) | -76.8 (4)  |
| C (150) -C (151) -C (152) -C (155) | 166.8 (3)  |
| C (26) -C (25) -C (250) -C (254)   | -179.6 (3) |
| C (24) -C (25) -C (250) -C (254)   | -1.3 (4)   |
| C (26) -C (25) -C (250) -C (253)   | -62.3 (4)  |
| C (24) -C (25) -C (250) -C (253)   | 116.0 (3)  |
| C (26) -C (25) -C (250) -C (251)   | 53.9 (4)   |
| C (24) -C (25) -C (250) -C (251)   | -127.7 (3) |
| C (25) -C (250) -C (251) -C (252)  | 61.0 (4)   |
| C (254) -C (250) -C (251) -C (252) | -65.7 (4)  |
| C (253) -C (250) -C (251) -C (252) | 178.4 (3)  |
| C (250) -C (251) -C (252) -C (255) | -62.5 (5)  |
| C (250) -C (251) -C (252) -C (256) | 64.3 (5)   |
| C (250) -C (251) -C (252) -C (257) | -178.9 (3) |

---

Table S-4. Hydrogen bonds for  $C_{60}H_{86}Cl_2N_2O_4S_2V_2$  (**1**)·4CH<sub>3</sub>CN [ $\text{\AA}$  and deg.].

| D-H...A                            | d(D-H) | d(H...A) | d(D...A) | <(DHA) |
|------------------------------------|--------|----------|----------|--------|
| C(13)-H(13)...Cl(1) <sup>(i)</sup> | 0.95   | 2.79     | 3.518(4) | 134    |
| C(6)-H(6A)...O(2) <sup>(ii)</sup>  | 0.98   | 2.52     | 3.429(7) | 155    |

Symmetry transformations used to generate equivalent atoms:

<sup>(i)</sup> -x, -y+2, -z+1; <sup>(ii)</sup> -x+1, -y+2, -z+1



Table S-5. Atomic coordinates ( $\times 10^4$ ) and equivalent isotropic displacement parameters ( $\text{\AA}^2 \times 10^3$ ) for  $\text{C}_{60}\text{H}_{86}\text{Cl}_2\text{N}_2\text{O}_4\text{S}_2\text{V}_2$  (**1**) $\cdot 4\text{CH}_3\text{CN}$ .  $U(\text{eq})$  is defined as one third of the trace of the orthogonalized  $U_{ij}$  tensor.

|        | x        | y        | z       | U(eq)  |
|--------|----------|----------|---------|--------|
| V(1)   | 1431(1)  | 9472(1)  | 5084(1) | 12(1)  |
| Cl(1)  | 3216(1)  | 9071(1)  | 6134(1) | 21(1)  |
| S(1)   | 2897(1)  | 9140(1)  | 3799(1) | 11(1)  |
| O(1)   | 306(2)   | 10135(1) | 4201(1) | 14(1)  |
| O(2)   | 149(3)   | 8240(2)  | 4789(1) | 16(1)  |
| N(1)   | 2972(3)  | 10898(2) | 5266(2) | 18(1)  |
| N(2)   | 4963(4)  | 1546(2)  | 8423(2) | 32(1)  |
| C(1)   | 3798(4)  | 11628(2) | 5178(2) | 24(1)  |
| C(2)   | 4842(5)  | 12554(3) | 5045(3) | 41(1)  |
| C(3)   | 3692(4)  | 1387(2)  | 8088(2) | 23(1)  |
| C(4)   | 2051(5)  | 1185(3)  | 7666(3) | 41(1)  |
| C(11)  | 2211(3)  | 9990(2)  | 3151(2) | 11(1)  |
| C(12)  | 997(3)   | 10424(2) | 3460(2) | 13(1)  |
| C(13)  | 538(4)   | 11126(2) | 2962(2) | 17(1)  |
| C(14)  | 1179(4)  | 11324(2) | 2170(2) | 16(1)  |
| C(15)  | 2336(4)  | 10871(2) | 1841(2) | 14(1)  |
| C(16)  | 2865(3)  | 10209(2) | 2366(2) | 13(1)  |
| C(21)  | 1426(3)  | 8062(2)  | 3459(2) | 13(1)  |
| C(22)  | 240(4)   | 7741(2)  | 4030(2) | 15(1)  |
| C(23)  | -883(4)  | 6882(2)  | 3768(2) | 20(1)  |
| C(24)  | -812(4)  | 6387(2)  | 2974(2) | 20(1)  |
| C(25)  | 374(4)   | 6718(2)  | 2396(2) | 16(1)  |
| C(26)  | 1492(4)  | 7572(2)  | 2662(2) | 14(1)  |
| C(150) | 2962(4)  | 11018(2) | 934(2)  | 14(1)  |
| C(151) | 4834(4)  | 11283(2) | 970(2)  | 15(1)  |
| C(152) | 5841(4)  | 12281(2) | 1335(2) | 18(1)  |
| C(153) | 2190(4)  | 11734(2) | 445(2)  | 17(1)  |
| C(154) | 2430(4)  | 10036(2) | 394(2)  | 21(1)  |
| C(155) | 7607(4)  | 12164(3) | 1458(3) | 28(1)  |
| C(156) | 5800(4)  | 13053(2) | 679(2)  | 24(1)  |
| C(157) | 5364(4)  | 12610(2) | 2222(2) | 22(1)  |
| C(250) | 464(4)   | 6212(2)  | 1503(2) | 19(1)  |
| C(251) | 2164(4)  | 6017(2)  | 1380(2) | 21(1)  |
| C(252) | 3001(4)  | 5391(3)  | 1958(3) | 30(1)  |
| C(253) | 170(5)   | 6896(3)  | 792(2)  | 29(1)  |
| C(254) | -871(4)  | 5288(2)  | 1322(2) | 24(1)  |
| C(255) | 3325(8)  | 5785(4)  | 2911(3) | 73(2)  |
| C(256) | 2093(6)  | 4343(3)  | 1883(4) | 62(2)  |
| C(257) | 4653(5)  | 5426(4)  | 1605(4) | 58(1)  |
| N(3)   | 7410(12) | 14625(5) | 4619(6) | 130(3) |
| C(5)   | 8322(11) | 14193(5) | 4345(5) | 86(2)  |
| C(6)   | 9408(10) | 13631(5) | 3981(4) | 84(2)  |

#1 -x, -y+2, -z+1      #2 -x+1, -y+2, -z+1

Table S-6. Anisotropic displacement parameters ( $\text{\AA}^2 \times 10^3$ ) for  $\text{C}_{60}\text{H}_{86}\text{Cl}_2\text{N}_2\text{O}_4\text{S}_2\text{V}_2$  ( $\mathbf{1}$ ) $\cdot 4\text{CH}_3\text{CN}$ .

|        | U11    | U22   | U33    | U23    | U13    | U12    |
|--------|--------|-------|--------|--------|--------|--------|
| V(1)   | 11(1)  | 14(1) | 12(1)  | 0(1)   | -5(1)  | 7(1)   |
| Cl(1)  | 17(1)  | 29(1) | 19(1)  | 6(1)   | -6(1)  | 11(1)  |
| S(1)   | 11(1)  | 11(1) | 13(1)  | 1(1)   | -5(1)  | 5(1)   |
| O(1)   | 12(1)  | 18(1) | 13(1)  | -1(1)  | -3(1)  | 8(1)   |
| O(2)   | 17(1)  | 16(1) | 15(1)  | 1(1)   | 0(1)   | 4(1)   |
| N(1)   | 16(1)  | 23(2) | 15(1)  | -3(1)  | -7(1)  | 7(1)   |
| N(2)   | 24(2)  | 38(2) | 35(2)  | 1(1)   | -3(1)  | 9(1)   |
| C(1)   | 19(2)  | 24(2) | 28(2)  | -4(1)  | -3(1)  | 7(2)   |
| C(2)   | 36(2)  | 27(2) | 56(3)  | -6(2)  | 6(2)   | -3(2)  |
| C(3)   | 26(2)  | 18(2) | 23(2)  | 0(1)   | -1(1)  | 7(1)   |
| C(4)   | 29(2)  | 46(2) | 43(2)  | -9(2)  | -17(2) | 8(2)   |
| C(11)  | 13(1)  | 9(1)  | 11(1)  | -2(1)  | -6(1)  | 4(1)   |
| C(12)  | 12(1)  | 13(1) | 13(1)  | 0(1)   | -4(1)  | 4(1)   |
| C(13)  | 16(2)  | 17(2) | 21(2)  | 0(1)   | -3(1)  | 12(1)  |
| C(14)  | 16(2)  | 13(1) | 20(2)  | 5(1)   | -6(1)  | 8(1)   |
| C(15)  | 15(1)  | 12(1) | 14(2)  | 3(1)   | -5(1)  | 3(1)   |
| C(16)  | 9(1)   | 11(1) | 19(2)  | -1(1)  | -4(1)  | 5(1)   |
| C(21)  | 10(1)  | 10(1) | 19(2)  | 0(1)   | -6(1)  | 4(1)   |
| C(22)  | 17(2)  | 14(1) | 16(2)  | 1(1)   | -4(1)  | 8(1)   |
| C(23)  | 18(2)  | 17(2) | 24(2)  | 4(1)   | 1(1)   | 2(1)   |
| C(24)  | 17(2)  | 15(2) | 26(2)  | -1(1)  | -4(1)  | 2(1)   |
| C(25)  | 15(2)  | 14(1) | 19(2)  | 0(1)   | -4(1)  | 8(1)   |
| C(26)  | 15(1)  | 14(1) | 15(1)  | 3(1)   | -3(1)  | 8(1)   |
| C(150) | 15(2)  | 14(2) | 15(2)  | 2(1)   | -4(1)  | 8(1)   |
| C(151) | 17(2)  | 14(1) | 17(2)  | 4(1)   | -1(1)  | 8(1)   |
| C(152) | 15(2)  | 15(2) | 24(2)  | 5(1)   | -5(1)  | 4(1)   |
| C(153) | 19(2)  | 20(2) | 15(2)  | 5(1)   | -4(1)  | 10(1)  |
| C(154) | 22(2)  | 16(2) | 22(2)  | -2(1)  | -7(1)  | 4(1)   |
| C(155) | 15(2)  | 30(2) | 39(2)  | 5(2)   | -6(1)  | 4(1)   |
| C(156) | 22(2)  | 16(2) | 31(2)  | 9(1)   | -4(1)  | -1(1)  |
| C(157) | 25(2)  | 17(2) | 22(2)  | -2(1)  | -8(1)  | 4(1)   |
| C(250) | 20(2)  | 16(2) | 21(2)  | -1(1)  | -6(1)  | 5(1)   |
| C(251) | 22(2)  | 18(2) | 21(2)  | -5(1)  | 2(1)   | 3(1)   |
| C(252) | 28(2)  | 24(2) | 39(2)  | -5(2)  | -4(2)  | 15(2)  |
| C(253) | 44(2)  | 27(2) | 18(2)  | -1(1)  | -9(2)  | 14(2)  |
| C(254) | 22(2)  | 23(2) | 25(2)  | -9(1)  | -4(1)  | 3(1)   |
| C(255) | 106(5) | 91(4) | 44(3)  | -13(3) | -32(3) | 83(4)  |
| C(256) | 42(3)  | 30(2) | 116(5) | 22(3)  | -13(3) | 15(2)  |
| C(257) | 31(2)  | 46(3) | 99(4)  | -2(3)  | 1(2)   | 17(2)  |
| N(3)   | 153(8) | 71(4) | 165(8) | 42(5)  | 54(6)  | 6(5)   |
| C(5)   | 109(6) | 62(4) | 72(4)  | 22(3)  | -10(4) | -14(4) |
| C(6)   | 114(6) | 66(4) | 65(4)  | 20(3)  | -12(4) | 3(4)   |

The anisotropic temperature factors are expressed as:

$$\exp[-2\pi^2(U_{11}h^2a^{*2} + U_{22}k^2b^{*2} + U_{33}l^2c^{*2} + 2U_{12}hka^*b^* + 2U_{23}klb^*c^* + 2U_{13}hla^*c^*)].$$

### Tables of polymerisation data for 1-and 2.

Tabela S-7. Ethene Polymerization Catalyzed by 1-Cocatalyst System Depending on Temperature<sup>a</sup>

| Run no. | Cocatalyst.           | [V]<br>mmol/dm <sup>3</sup> | Al:V | Activity<br>kgPE/molVh | d <sub>n</sub> ,<br>g/dm <sup>3</sup> | M <sub>w</sub> /M <sub>n</sub> | T<br>K |
|---------|-----------------------|-----------------------------|------|------------------------|---------------------------------------|--------------------------------|--------|
| 1       | Al(i-Bu) <sub>3</sub> | 0,01                        | 1000 | 1516                   | 145                                   | 3,11                           | 293    |
| 2       | Al(i-Bu) <sub>3</sub> | 0,01                        | 1000 | 2994                   | 138                                   | 2,68                           | 303    |
| 3       | Al(i-Bu) <sub>3</sub> | 0,01                        | 1000 | 6320                   | 130                                   | 3,32                           | 313    |
| 4       | Al(i-Bu) <sub>3</sub> | 0,01                        | 1000 | 10624                  | 133                                   | 3,47                           | 323    |
| 5       | Al(i-Bu) <sub>3</sub> | 0,01                        | 1000 | 9236                   | 128                                   | 3,75                           | 333    |
| 6       | Al(i-Bu) <sub>3</sub> | 0,01                        | 1000 | 4288                   | 116                                   | 4,16                           | 343    |

<sup>a</sup> Polymerisation conditions: P<sub>ethene</sub> = 0,5 MPa, time = 30 min, V<sub>hexane</sub> = 1 L

Tabela S-8. Ethene Polymerisation Catalyzed by 2-Cocatalyst System Depending on Temperature<sup>a</sup>

| Run no. | Cocatalyst            | [V]<br>mmol/dm <sup>3</sup> | Al:V | Activity<br>kgPE/molVh | d <sub>n</sub> ,<br>g/dm <sup>3</sup> | M <sub>w</sub> /M <sub>n</sub> | T <sub>p</sub><br>K |
|---------|-----------------------|-----------------------------|------|------------------------|---------------------------------------|--------------------------------|---------------------|
| 1       | Al(i-Bu) <sub>3</sub> | 0,01                        | 1000 | 974                    | 123                                   | 3,22                           | 293                 |
| 2       | Al(i-Bu) <sub>3</sub> | 0,01                        | 1000 | 1590                   | 134                                   | 3,17                           | 303                 |
| 3       | Al(i-Bu) <sub>3</sub> | 0,01                        | 1000 | 2416                   | 129                                   | 3,51                           | 313                 |
| 4       | Al(i-Bu) <sub>3</sub> | 0,01                        | 1000 | 3068                   | 133                                   | 3,74                           | 323                 |
| 5       | Al(i-Bu) <sub>3</sub> | 0,01                        | 1000 | 3632                   | 125                                   | 3,65                           | 333                 |
| 6       | Al(i-Bu) <sub>3</sub> | 0,01                        | 1000 | 2906                   | 127                                   | 3,98                           | 343                 |

<sup>a</sup> Polymerisation conditions: P<sub>ethene</sub> = 0,5 MPa, time = 30 min, V<sub>hexane</sub> = 1 L
